# Supplementary material for: Accuracy of pulse CO-oximetry to evaluate blood carboxyhemoglobin level: a systematic review and meta-analysis of diagnostic test accuracy studies
Source: PubMed Central journal article supplement — Eur J Emerg Med. 2023 May 31;30(4):233–43. doi: 10.1097/MEJ.0000000000001043 (PMC10306338; doi:10.1097/mej.0000000000001043), 2023-05-31
Supplement: ejem-30-233-s001.pdf [file ejem-30-233-s001.pdf]

## Online data supplement

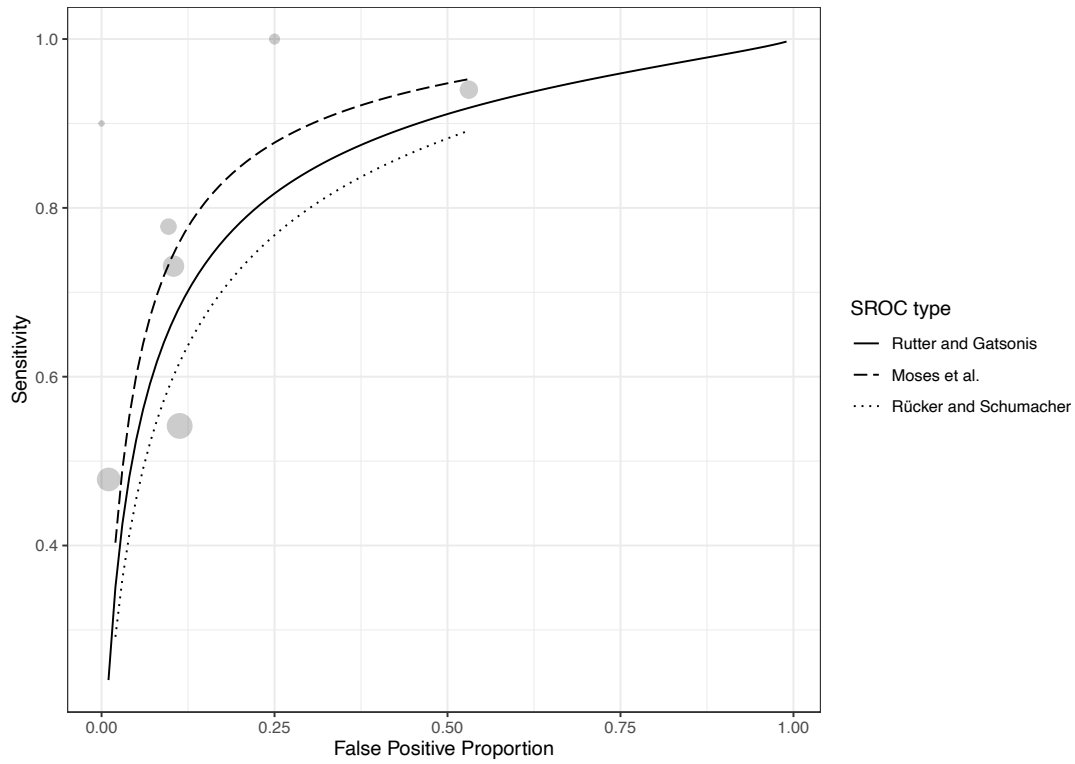

**Figure E1**  
Summary ROC curves of studies using the Rad-57<sup>®</sup> device

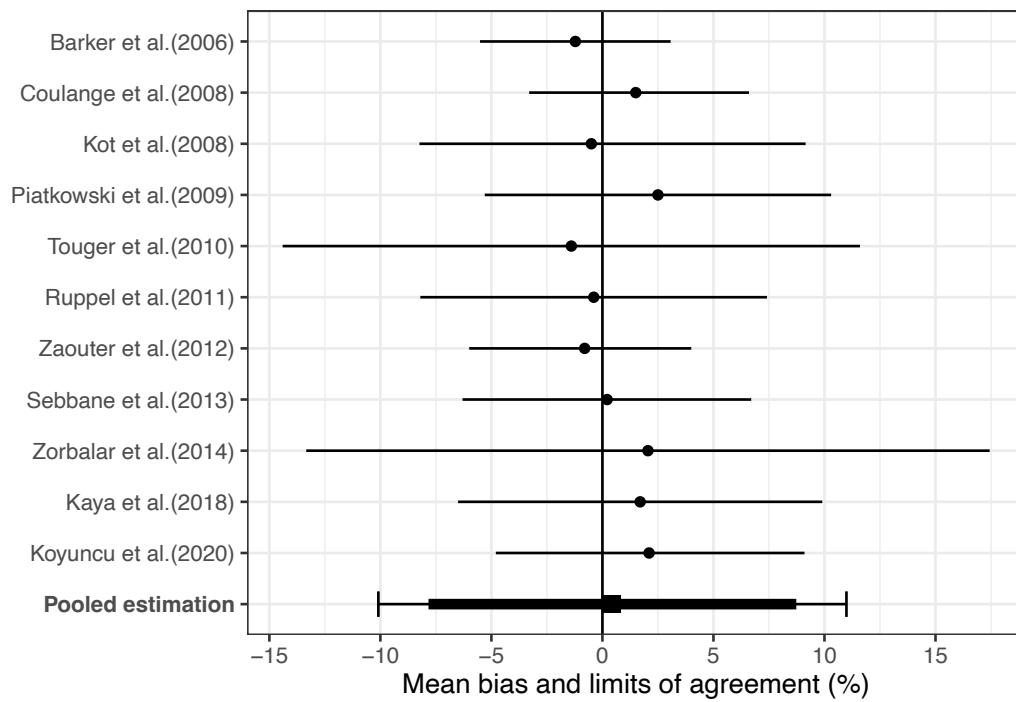

**Figure E2**  
Limits of agreement of studies using the Rad-57<sup>®</sup> device

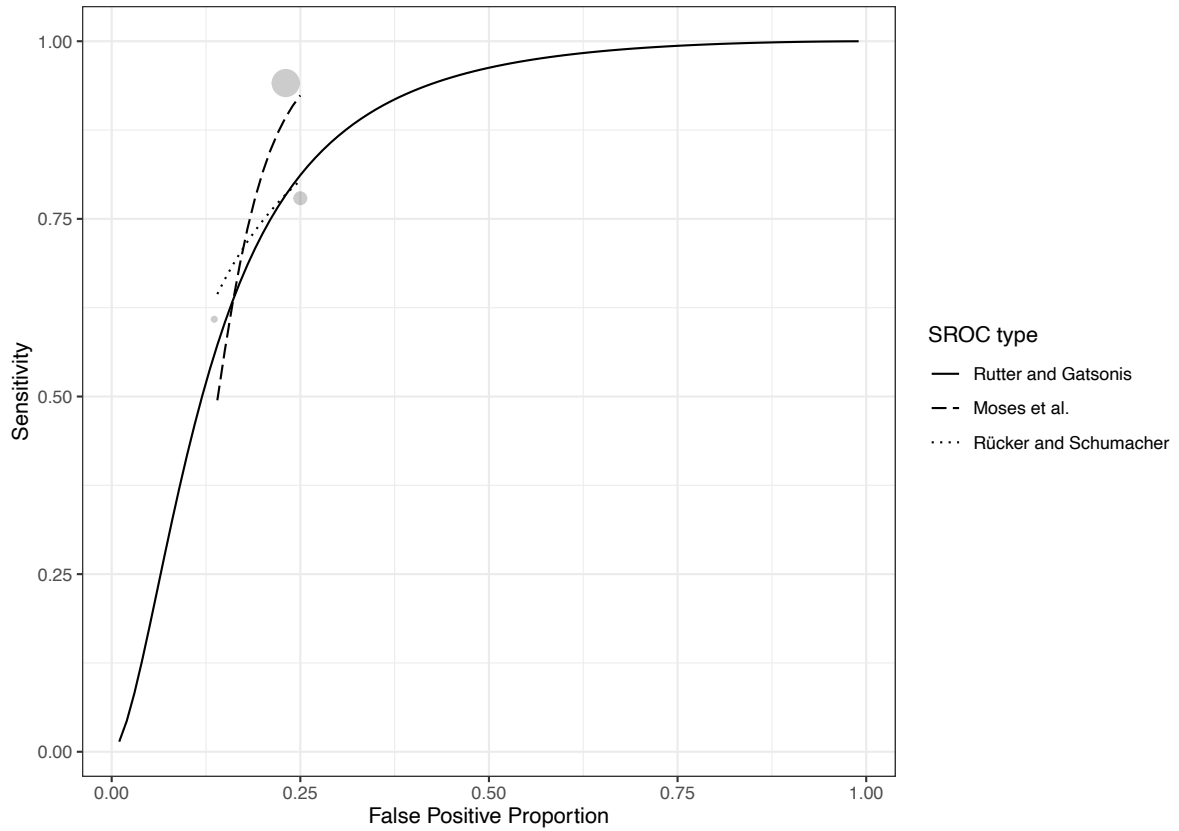

**Figure E3**  
Summary ROC curves of studies using the Radical-7® device

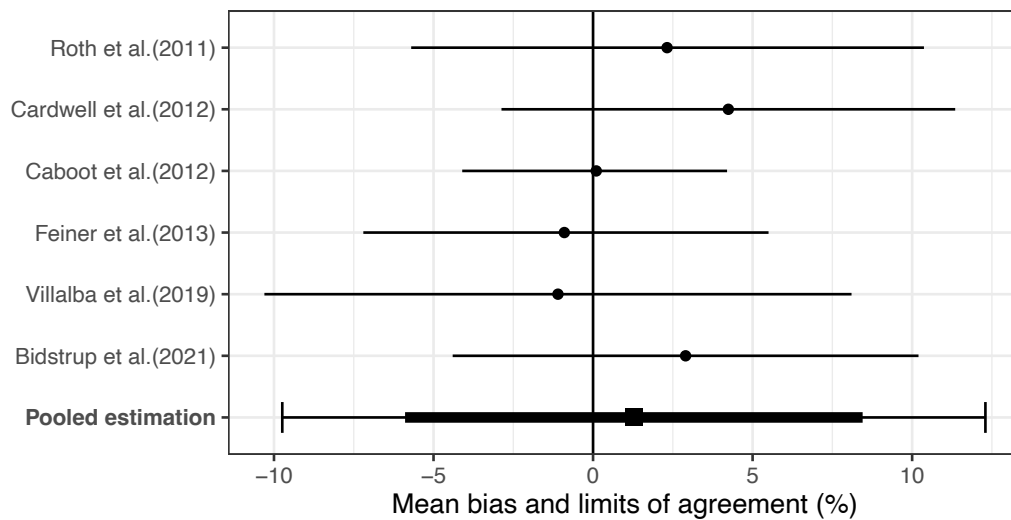

**Figure E4**  
Limits of agreement of studies using the Radical-7® device

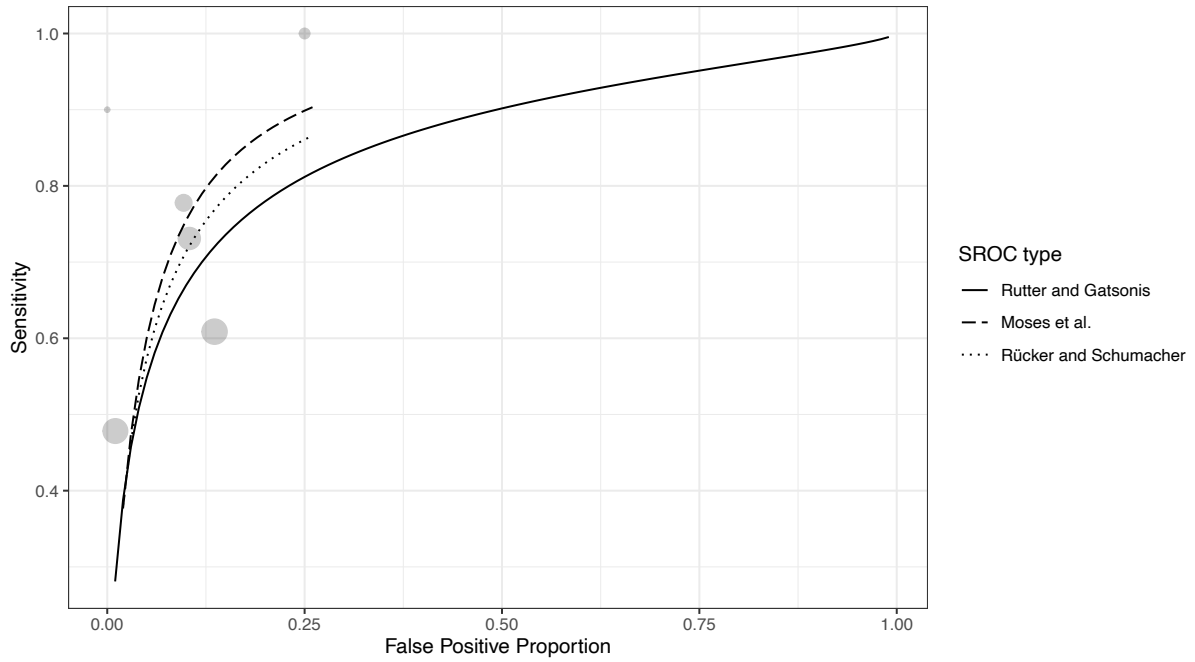

**Figure E5**  
Summary ROC curves of studies including subjects with suspected carbon monoxide poisoning

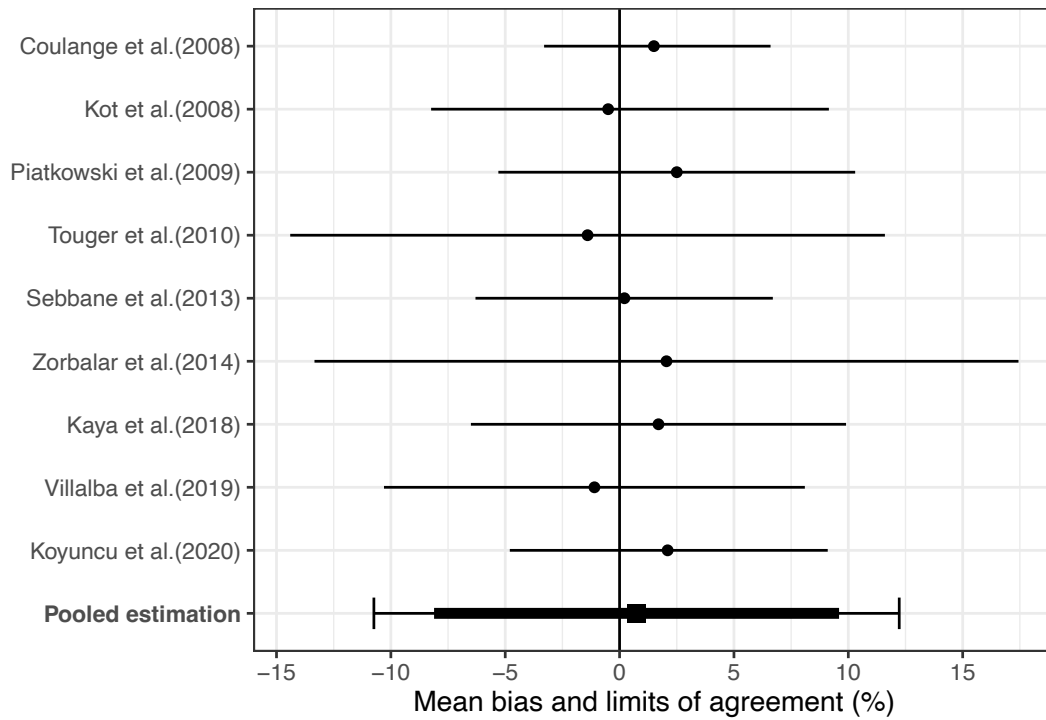

**Figure E6**  
Limits of agreement of studies including subjects with suspected carbon monoxide poisoning
